# Supplementary material
Source: PubMed Central journal article supplement (PMC3347181)
Supplement: supp_194.10.2677_SuppMaterial.pdf [file supp_194.10.2677_SuppMaterial.pdf]

Table S1. Oligonucleotides used in this study.

|                                    |                                                  |
|------------------------------------|--------------------------------------------------|
| <i>Strain construction primers</i> |                                                  |
| 01838-usNF-BamHI                   | TTGGTTGGATCCGGCAACTGGTAACATTAACGAACGC            |
| 01838-usNR                         | CTTTTCTGTCTGTAAAACCTTAACCTCCATTATATGATTTATATATGC |
| 01838-dsCF                         | GGAGGTTAAGTTTTACAGACAGAAAAGTACATTAAGAGCC         |
| 01838-dsCR-Sall                    | AACCAAGTCGACCGTGACTATGGTAAACACGTCGGC             |
| 01761-usNF-BamHI                   | TTGGTTGGATCCCCCGCACGTGTATTAGTTGAGATTAAATC        |
| 01761-usNR                         | GGAGGCGAACTGAAATTATTGCATAAGAAATATATTTTAGTTATCC   |
| 01761-dsCF                         | CTTATGCAATAATTTCAAGTTCGCTCCAATGTCTTCATC          |
| 01761-dsCR-Sall                    | AACCAAGTCGACCCAGTCTTGTAAGAAGCGGGTTAC             |
| <i>Strain verification primers</i> |                                                  |
| 01838 $\Delta$ -usNF               | TTGGTTCGTATTACCAATTCCGGCAATAATTG                 |
| 01838 $\Delta$ -dsCR               | AACCAAGAGACTGGTTAGGACAAATCTCA                    |
| 01761 $\Delta$ -usNF               | TTGGTTCGTAGTTCTTTTCATCATAACGATC                  |
| 01761 $\Delta$ -dsCR               | AACCAAGAAGGAGTGTGGTTTGATTTTAGGG                  |
| <i>qRT-PCR primers</i>             |                                                  |
| 16SF                               | GCCTAATACATGCAAGTCGAGCGAACAGACG                  |
| 16SR                               | GCGCGGATCCATCTATAAGTGACAGC                       |
| 00051F                             | GCACATGCGTCAGATTCGTTGAGT                         |
| 00051R                             | AGCCACTATCATGTGAACCCGGTA                         |
| 00069F                             | AAATGCTGATCAACGCAATG                             |
| 00069R                             | AGGCGCTTTGTTGATCTTTG                             |
| 00094F                             | AAATGCGCATGCCGACACAACCTT                         |
| 00094R                             | TTGTGCTTGCGTCATTCCTTGTGG                         |
| 00192F                             | TTTCGCTAGGCGCATTAGCAGTTG                         |
| 00192R                             | CTCCCAGCATTAACTTGTGATTTCCAC                      |
| 00256F                             | CAACACGCCAAACAACAATC                             |
| 00256R                             | TCGGTATTGCTGGTGTCAA                              |
| 00300F                             | CACATGAAGCACAAGCCTCGGAAA                         |
| 00300R                             | TTATCGCATTCCCTTGTCTCCCG                          |
| 00354F                             | GGAACATACACAGTTGCTGGCAGA                         |
| 00354R                             | GGCAAATGTTCTCCCATATACAAGCC                       |
| 00399F                             | CAGGGATGATTACAACACTACTGCTCAGCC                   |
| 00399R                             | CCTGACTGATTTGTATACTCAAAGAACGG                    |
| 00427F                             | CGGGTGAATCAGTGTGGGCAATTT                         |
| 00427R                             | TGAGTTCGTTGATGGACGGCTACT                         |
| 00472F                             | TTAGCGCAAGAAGTTGCTGA                             |
| 00472R                             | GCTGCAGAAGCACGTTTACA                             |
| 00617F                             | GTTGGCAAAGCAGTAACACATACGG                        |
| 00617R                             | GGTGCTGAGGCAAATTGATAAGTCG                        |
| 00728F                             | GTTCTGTCTGTAATGGCGGC                             |
| 00728R                             | GTCATCTTCAGATGCTAGCGC                            |
| 00818F                             | GTGCTGGCATATGTATGGCAATCGT                        |
| 00818R                             | ACCTCTTTGCGTATTGCCCTTTTCG                        |
| 00897F                             | CTGCTGGCGCTGAACAAACAATC                          |
| 00897R                             | ATGCTTGAAACGTATGCTCGGGTG                         |
| 00987F                             | AGCCAAAGCCGATTCACACTCT                           |
| 00987R                             | GCTTCGCCAAGTTCATATTTACCAG                        |
| 00988F                             | CGTTGCAACTTTGACAACAGCGAC                         |
| 00994F                             | CAAGACCCTGCTATTGTCCAACCA                         |
| 00994R                             | GTTGACTTTGCAACAGGCTGCGTA                         |
| 00988R                             | GGTGTTTGTGTTTGTGCTTACTGC                         |
| 01114F                             | GCGAAGGATACGGTCCAAGAGAAA                         |
| 01114R                             | GGACGTGCACCATATTCGAATGTACC                       |
| 01121F                             | GAACGAAAGGTACCATTGCTGGTCA                        |
| 01121R                             | TAAAGGCTGAAGGCCAGGCTAAAC                         |
| 01125F                             | TGGCAAAAAGATAACGGTACG                            |
| 01125R                             | TGCTGCAGGAGTAACACCAC                             |
| 01652F                             | TACAAATCGCACAAGGCTCA                             |
| 01652R                             | CAGCCGTATCCAACATTTCC                             |
| 01761F                             | CGCAACCCACTAATGATGCC                             |
| 01761R                             | CACGCATTGACTCATCTCC                              |

01838F GACCGCCCTTCGATTGGTATTGG  
01838R CGGTAACAGTGACTIONGATTACCAGG  
01935F GTCGGCACAACAATGGTTGAAGGT  
01935R AACTACAAATCCTGTTCCAGCGCC  
01936F GGCACAACAGTGGTTGAGGGTATT  
01936R CCAGATCCTATCGAAACGACACCA  
01938F TCGGCACAACAGTGGTTGATGGTA  
01938R TACAAATCCTGTTCCAGCGCCCAT  
01939F TACTGCCCATCCAAACGGTGACAA  
01939R GTCCACGTTCTGACTGCTTGTCTT  
01941F AGTGGGCGATCGTATTACTGCACA  
01941R GTCCACGTTCTATTGCACGCTCTT  
01942F TGTGGGTGGTACTGGTGTAGTTGT  
01942R TAACGTCGTAGTTTCCCTCCGCCTT  
01949F TGAGTAATGCATCAGCGTCAGAAG  
01949R TCTGTGCCACATGTAATTCCGGT  
01954F ACGTTAGTACTTAAGGCAGCCGGA  
01954R CCGAAACATTATACTTACCGCCC  
01972F GCTGGAGACGTAACAGTTGCAG  
01972R CGGCTGTTAAACCTTGCTGTTGAAGGGCC  
02127F CCCTATTGCAAACGCTGAGAGCAA  
02127R GGTTACCAAGTGTATACGAGGCT  
02171F CCAACAGGCCCGTATTTGATGGTA  
02171R TATGCTGTCGCATCTAATGCC  
02241F TGCCTGTAAGTGTGTCTGAAGGGT  
02241R CCCAGAAACCATGGCGATTCCAA  
02243F TCAGCAGCAACGACTCAAGCAA  
02243R TTCCAATATCATCCGGTGCTG  
02260F AGGAAGGAGTATTTCAATGGCAC  
02260R GTGAATTTGTTCACTGTGTGATAATCC  
02463F TGAGGAACACATGGCTGGACGTTA  
02463R TTCGTGCGCTCTTTCTCTGTAGCA  
02466F TGCATTACCGAGTCACGAAG  
02466R AAGTTGCTGTTTGGGCATTA  
02706F TAAAGACAGCAAGAACCCAGACCG  
02706R CCCAACTTGTTGGCTTCTATCAGGG  
02708F TCGGCCAAGGTGCAGAAATCATCA  
02708R GCCTTGATCTTAACAAGTAGGGCA  
02709F TCGGTGGTAATTTCCAATCAGCCC  
02709R CGAATGAATTCGCTTTGACGCC  
02710F GGAAGAGATAGCTTCCACCCAACA  
02710R TGGCATTGTTGTTGCGCTATGA  
02742F TGTAAGTTTGCCTGGACTAGG  
02742R CCCGTTAAATCTGTGCCATT  
02798F TGCACCACAGGGTGTAGAAG  
02798R TCGGTTATGAGTGACTIONGACGA  
02885F CGTACAAGGACAAATACCGG  
02885R CTGTCCACTGAGCACAACG  
02971F GCAACCGAGTGTGATGGTGTTC  
02971R GCTTTGTGCGCTGCGTCATCTTTA  
02972F AGCAGCAACATTAGCATTGGGCAC  
02972R TTGCTGCCTGTGCCTGTTTACTTG  
02979F CCTCGTAATGGCGAAAAGTC  
02979R TGGCGAATTTGGTTGCTTAT  
03006F CAAGCACAAGCAGCTGAGAAGCAA  
03006R GTATGTTGCTGTTGCTCAACACCG

---

Table S2. List of proteins identified by MudPIT with greater than 10 spectral counts in the absence of arylomycin treatment (0xMIC)

| Protein                                                                                                | Spectral Counts <sup>a</sup> |             |             |                   | Fold-Decrease vs 0xMIC |         |       | p-value <sup>b</sup> |
|--------------------------------------------------------------------------------------------------------|------------------------------|-------------|-------------|-------------------|------------------------|---------|-------|----------------------|
|                                                                                                        | 0xMIC                        | 0.5xMIC     | 2xMIC       | 8xMIC             | 2xMIC                  | 0.5xMIC | 8xMIC |                      |
| SAOUHSC_00002 - DNA polymerase III, beta subunit [2.7.7.7] {Staphylococcus aureus}                     | 16.5 ± 2                     | 50.5 ± 4    | 41.8 ± 4    | 18.3 ± 5          | 0.3                    | 0.4     | 0.9   | 0.379074             |
| SAOUHSC_00006 - DNA gyrase, A subunit [5.99.1.3] {Staphylococcus aureus}                               | 10 ± 5                       | 16.3 ± 5    | 7.5 ± 3     | 1 ± 1             | 0.6                    | 1.3     | 10.0  | 0.065498             |
| SAOUHSC_00009 - seryl-tRNA synthetase [6.1.1.11] {Staphylococcus aureus}                               | 21.5 ± 7                     | 49.5 ± 6    | 48 ± 9      | 17 ± 4            | 0.4                    | 0.4     | 1.3   | 0.290055             |
| SAOUHSC_00019 - adenylosuccinate synthetase [6.3.4.4] {Staphylococcus aureus}                          | 41.3 ± 9                     | 76.8 ± 15   | 50.5 ± 7    | 8.8 ± 1           | 0.5                    | 0.8     | 4.7   | 0.007070             |
| SAOUHSC_00025 - conserved hypothetical protein {Staphylococcus aureus}                                 | 76 ± 8                       | 67.8 ± 13   | 81.5 ± 14   | 55.3 ± 15         | 1.1                    | 0.9     | 1.4   | 0.140803             |
| SAOUHSC_00051 - 1-phosphatidylinositol phosphodiesterase precursor, putative {Staphylococcus aureus}   | 591.5 ± 74                   | 70.5 ± 16   | 125.5 ± 2   | 76.8 ± 25         | 8.4                    | 4.7     | 7.7   | 0.000282             |
| SAOUHSC_00052 - conserved hypothetical protein {Staphylococcus aureus}                                 | 11.8 ± 4                     | 7.3 ± 3     | 8.5 ± 3     | 9.3 ± 2           | 1.6                    | 1.4     | 1.3   | 0.303738             |
| SAOUHSC_00069 - protein A {Staphylococcus aureus NCTC 8325} xxxxx                                      | 28 ± 5                       | 19.5 ± 5    | 25.3 ± 9    | 2.8 ± 2           | 1.4                    | 1.1     | 10.2  | 0.002306             |
| SAOUHSC_00086 - 3-ketoacyl-acyl carrier protein reductase, putative [1.1.1.11] {Staphylococcus aureus} | 19.5 ± 7                     | 42.5 ± 6    | 37.5 ± 8    | 14.8 ± 5          | 0.5                    | 0.5     | 1.3   | 0.297291             |
| SAOUHSC_00093 - superoxide dismutase, putative {Staphylococcus aureus}                                 | 20.3 ± 3                     | 69.3 ± 25   | 27 ± 2      | 9 ± 1             | 0.3                    | 0.8     | 2.3   | 0.012559             |
| SAOUHSC_00094 - conserved hypothetical protein {Staphylococcus aureus}                                 | 297.8 ± 23                   | 70.3 ± 8    | 64.5 ± 6    | 44.3 ± 11         | 4.2                    | 4.6     | 6.7   | 0.000033             |
| SAOUHSC_00101 - phosphopentomutase [5.4.2.7] {Staphylococcus aureus}                                   | 10.5 ± 3                     | 33.3 ± 4    | 26.3 ± 1    | 10.3 ± 3          | 0.3                    | 0.4     | 1.0   | 0.477449             |
| SAOUHSC_00106 - conserved hypothetical protein {Staphylococcus aureus}                                 | 11.5 ± 3                     | 3.3 ± 1     | 7 ± 1       | 8 ± 2             | 3.5                    | 1.6     | 1.4   | 0.197371             |
| SAOUHSC_00113 - alcohol dehydrogenase, iron-containing, putative {Staphylococcus aureus}               | 35.3 ± 5                     | 61 ± 21     | 42.8 ± 15   | 5.3 ± 0           | 0.6                    | 0.8     | 6.7   | 0.000578             |
| SAOUHSC_00153 - indolepyruvate decarboxylase, putative {Staphylococcus aureus}                         | 15.3 ± 4                     | 41.3 ± 8    | 28.8 ± 5    | 5.8 ± 2           | 0.4                    | 0.5     | 2.7   | 0.034989             |
| SAOUHSC_00187 - formate acetyltransferase [2.3.1.54] {Staphylococcus aureus}                           | 242 ± 36                     | 269.3 ± 90  | 241.5 ± 72  | 68 ± 16           | 0.9                    | 1.0     | 3.6   | 0.002243             |
| SAOUHSC_00192 - coagulase {Staphylococcus aureus NCTC 8325} xxxxx                                      | 58.3 ± 39                    | 20 ± 13     | 33 ± 19     | 6.3 ± 1           | 2.9                    | 1.8     | 9.3   | 0.114781             |
| SAOUHSC_00196 - conserved hypothetical protein {Staphylococcus aureus}                                 | 11.3 ± 3                     | 20.3 ± 5    | 20 ± 6      | 3 ± 2             | 0.6                    | 0.6     | 3.8   | 0.023285             |
| SAOUHSC_00201 - conserved hypothetical protein {Staphylococcus aureus}                                 | 10 ± 3                       | 9.8 ± 2     | 15.3 ± 1    | 9.5 ± 2           | 1.0                    | 0.7     | 1.1   | 0.442338             |
| SAOUHSC_00204 - Globin domain protein {Staphylococcus aureus NCTC 8325}                                | 41.3 ± 5                     | 117 ± 16    | 90 ± 25     | 15.8 ± 6          | 0.4                    | 0.5     | 2.6   | 0.010546             |
| SAOUHSC_00206 - L-lactate dehydrogenase [1.1.1.27] {Staphylococcus aureus}                             | 55.8 ± 5                     | 104 ± 16    | 130 ± 41    | 29 ± 4            | 0.5                    | 0.4     | 1.9   | 0.003149             |
| SAOUHSC_00248 - peptidoglycan hydrolase, putative {Staphylococcus aureus}                              | 28.3 ± 7                     | 28.8 ± 8    | 65 ± 24     | 70.8 ± 18         | 1.0                    | 0.4     | 0.4   | 0.035943             |
| SAOUHSC_00253 - conserved hypothetical protein {Staphylococcus aureus}                                 | 32 ± 9                       | 23.3 ± 4    | 34 ± 2      | 25.8 ± 6          | 1.4                    | 0.9     | 1.2   | 0.298116             |
| SAOUHSC_00256 - conserved hypothetical protein {Staphylococcus aureus}                                 | 31.8 ± 4                     | 14.5 ± 7    | 26.5 ± 12   | 16 ± 4            | 2.2                    | 1.2     | 2.0   | 0.016119             |
| SAOUHSC_00258 - conserved hypothetical protein {Staphylococcus aureus}                                 | 13.3 ± 4                     | 9 ± 2       | 15 ± 1      | 30.8 ± 8          | 1.5                    | 0.9     | 0.4   | 0.044870             |
| SAOUHSC_00284 - 5-nucleotidase, lipoprotein e(P4) family {Staphylococcus aureus}                       | 48.5 ± 4                     | 134 ± 73    | 132.3 ± 90  | 77 ± 14           | 0.4                    | 0.4     | 0.6   | 0.047008             |
| SAOUHSC_00300 - lipase precursor [3.1.1.3] {Staphylococcus aureus NCTC 8325}                           | 642.3 ± 40                   | 109.3 ± 22  | 129 ± 44    | 50.8 ± 16         | 5.9                    | 5.0     | 12.7  | 0.000005             |
| SAOUHSC_00336 - acetyl-CoA acetyltransferase, putative {Staphylococcus aureus}                         | 16 ± 4                       | 32 ± 5      | 28 ± 3      | 2.8 ± 1           | 0.5                    | 0.6     | 5.8   | 0.007797             |
| SAOUHSC_00354 - superantigen-like protein                                                              | 20.5 ± 10                    | 11.8 ± 9    | 16.5 ± 13   | n.d. <sup>c</sup> | 1.7                    | 1.2     | -     | 0.040926             |
| SAOUHSC_00364 - alkyl hydroperoxide reductase, subunit F, putative [1.1.1.11] {Staphylococcus aureus}  | 57.3 ± 12                    | 101.3 ± 27  | 68.3 ± 16   | 25 ± 9            | 0.6                    | 0.8     | 2.3   | 0.033407             |
| SAOUHSC_00365 - alkyl hydroperoxide reductase {Staphylococcus aureus}                                  | 108.8 ± 24                   | 282.3 ± 106 | 264.3 ± 128 | 66.3 ± 23         | 0.4                    | 0.4     | 1.6   | 0.124538             |
| SAOUHSC_00369 - conserved hypothetical protein {Staphylococcus aureus}                                 | 10.3 ± 2                     | 16.8 ± 3    | 19.3 ± 3    | 8.5 ± 2           | 0.6                    | 0.5     | 1.2   | 0.286741             |
| SAOUHSC_00374 - inosine-5-monophosphate dehydrogenase [1.1.1.205] {Staphylococcus aureus}              | 107 ± 20                     | 158.8 ± 48  | 102 ± 12    | 5 ± 2             | 0.7                    | 1.0     | 21.4  | 0.001145             |
| SAOUHSC_00375 - GMP synthase, putative [6.3.5.2] {Staphylococcus aureus}                               | 37.3 ± 6                     | 77.8 ± 14   | 50 ± 9      | 12.5 ± 4          | 0.5                    | 0.7     | 3.0   | 0.005609             |
| SAOUHSC_00399 - superantigen-like protein                                                              | 24.8 ± 1                     | 7.8 ± 2     | 11 ± 4      | 5 ± 2             | 3.2                    | 2.3     | 5.0   | 0.000163             |
| SAOUHSC_00400 - conserved hypothetical protein {Staphylococcus aureus}                                 | 74.3 ± 19                    | 24.8 ± 5    | 43 ± 15     | 25.5 ± 3          | 3.0                    | 1.7     | 2.9   | 0.020626             |
| SAOUHSC_00401 - conserved hypothetical protein {Staphylococcus aureus}                                 | 13 ± 6                       | 51 ± 16     | 90.3 ± 45   | 51.8 ± 15         | 0.3                    | 0.1     | 0.3   | 0.028557             |
| SAOUHSC_00405 - conserved hypothetical protein {Staphylococcus aureus}                                 | 14.3 ± 2                     | 19.3 ± 3    | 20.3 ± 3    | 19.5 ± 4          | 0.7                    | 0.7     | 0.7   | 0.148546             |
| SAOUHSC_00427 - autolysin precursor, putative [3.2.1.-] {Staphylococcus aureus}                        | 250 ± 56                     | 32.5 ± 24   | 60.5 ± 40   | 18.8 ± 11         | 7.7                    | 4.1     | 13.3  | 0.003450             |
| SAOUHSC_00461 - methionyl-tRNA synthetase, putative [6.1.1.10] {Staphylococcus aureus}                 | 29.5 ± 7                     | 50.5 ± 9    | 45 ± 15     | 6 ± 3             | 0.6                    | 0.7     | 4.9   | 0.010967             |
| SAOUHSC_00472 - ribose-phosphate pyrophosphokinase, putative [2.7.1.1] {Staphylococcus aureus}         | 14.3 ± 3                     | 8.8 ± 5     | 4.3 ± 2     | n.d. <sup>c</sup> | 1.6                    | 3.4     | -     | 0.002683             |

|                                                                       |             |             |             |                   |     |     |      |          |
|-----------------------------------------------------------------------|-------------|-------------|-------------|-------------------|-----|-----|------|----------|
| SAOUHSC_00474 - ribosomal 5S rRNA E-loop binding protein Ctc/L25/TL   | 46.5 ± 8    | 130 ± 53    | 103.5 ± 41  | 35.8 ± 11         | 0.4 | 0.4 | 1.3  | 0.226556 |
| SAOUHSC_00488 - conserved hypothetical protein {Staphylococcus aure   | 45.8 ± 7    | 67.8 ± 18   | 48.5 ± 8    | 17.3 ± 4          | 0.7 | 0.9 | 2.7  | 0.004761 |
| SAOUHSC_00493 - lysyl-tRNA synthetase [6.1.1.6] {Staphylococcus aur   | 13.3 ± 4    | 41.8 ± 15   | 30.8 ± 9    | n.d. <sup>c</sup> | 0.3 | 0.4 | -    | 0.012070 |
| SAOUHSC_00505 - endopeptidase, putative {Staphylococcus aureus NCT    | 27.8 ± 8    | 39.5 ± 8    | 31.5 ± 7    | 9.5 ± 3           | 0.7 | 0.9 | 2.9  | 0.044324 |
| SAOUHSC_00509 - glutamyl-tRNA synthetase [6.1.1.17] {Staphylococcu    | 13.8 ± 4    | 46.3 ± 10   | 39.3 ± 7    | 9 ± 3             | 0.3 | 0.4 | 1.5  | 0.196135 |
| SAOUHSC_00511 - cysteinyl-tRNA synthetase [6.1.1.16] {Staphylococcu   | 17 ± 2      | 48.3 ± 11   | 35 ± 6      | 9.3 ± 2           | 0.4 | 0.5 | 1.8  | 0.025128 |
| SAOUHSC_00518 - ribosomal protein L11 {Staphylococcus aureus NCTC     | 17.5 ± 4    | 24 ± 2      | 37.8 ± 16   | 9.8 ± 3           | 0.7 | 0.5 | 1.8  | 0.078533 |
| SAOUHSC_00519 - ribosomal protein L1 {Staphylococcus aureus NCTC 8    | 21 ± 4      | 65 ± 26     | 37.8 ± 13   | 9.3 ± 3           | 0.3 | 0.6 | 2.3  | 0.024407 |
| SAOUHSC_00520 - ribosomal protein L10 {Staphylococcus aureus NCTC     | 14.5 ± 3    | 23.3 ± 4    | 24.5 ± 6    | 9.5 ± 3           | 0.6 | 0.6 | 1.5  | 0.107422 |
| SAOUHSC_00521 - ribosomal protein L7/L12 {Staphylococcus aureus NC    | 19 ± 14     | 187.5 ± 108 | 127.3 ± 45  | 21.8 ± 6          | 0.1 | 0.1 | 0.9  | 0.431944 |
| SAOUHSC_00524 - RNA polymerase beta chain, putative [2.7.7.6] {Stap   | 37 ± 5      | 119.5 ± 9   | 86.5 ± 6    | 25 ± 7            | 0.3 | 0.4 | 1.5  | 0.099107 |
| SAOUHSC_00525 - DNA directed RNA polymerase beta-prime chain, put     | 64.5 ± 1    | 140 ± 8     | 124.8 ± 14  | 30.5 ± 9          | 0.5 | 0.5 | 2.1  | 0.005679 |
| SAOUHSC_00529 - translation elongation factor G {Staphylococcus aure  | 191.8 ± 41  | 485.3 ± 270 | 256.8 ± 66  | 83.3 ± 24         | 0.4 | 0.7 | 2.3  | 0.031007 |
| SAOUHSC_00530 - translation elongation factor Tu {Staphylococcus aure | 317.8 ± 66  | 495 ± 224   | 476 ± 180   | 221.8 ± 76        | 0.6 | 0.7 | 1.4  | 0.188469 |
| SAOUHSC_00532 - conserved hypothetical protein {Staphylococcus aure   | 21.3 ± 4    | 52.3 ± 10   | 40.5 ± 11   | 14.8 ± 4          | 0.4 | 0.5 | 1.4  | 0.150931 |
| SAOUHSC_00533 - conserved hypothetical protein {Staphylococcus aure   | 10.3 ± 5    | 35.5 ± 9    | 34 ± 10     | 7.8 ± 3           | 0.3 | 0.3 | 1.3  | 0.349180 |
| SAOUHSC_00536 - branched-chain amino acid aminotransferase [2.6.1.4   | 51 ± 9      | 83.5 ± 10   | 72.3 ± 14   | 27.3 ± 9          | 0.6 | 0.7 | 1.9  | 0.055677 |
| SAOUHSC_00544 - sdrC protein, putative {Staphylococcus aureus NCTC    | 66.8 ± 25   | 63.8 ± 14   | 90 ± 17     | 126.3 ± 29        | 1.0 | 0.7 | 0.5  | 0.086784 |
| SAOUHSC_00545 - sdrD protein, putative {Staphylococcus aureus NCTC    | 18.5 ± 10   | 14.3 ± 4    | 24.3 ± 6    | 62 ± 21           | 1.3 | 0.8 | 0.3  | 0.053895 |
| SAOUHSC_00573 - conserved hypothetical protein {Staphylococcus aure   | 10 ± 3      | 28.5 ± 7    | 15.3 ± 3    | 3.3 ± 1           | 0.4 | 0.7 | 3.1  | 0.057351 |
| SAOUHSC_00574 - phosphate acetyltransferase [2.3.1.8] {Staphylococc   | 62.8 ± 11   | 115 ± 43    | 130.3 ± 46  | 19.8 ± 9          | 0.5 | 0.5 | 3.2  | 0.011185 |
| SAOUHSC_00608 - alcohol dehydrogenase I, putative {Staphylococcus a   | 186.3 ± 49  | 297.3 ± 60  | 192.8 ± 38  | 50 ± 7            | 0.6 | 1.0 | 3.7  | 0.017106 |
| SAOUHSC_00611 - arginyl-tRNA synthetase [6.1.1.19] {Staphylococcus    | 16 ± 5      | 51 ± 3      | 33.8 ± 5    | 12 ± 2            | 0.3 | 0.5 | 1.3  | 0.237893 |
| SAOUHSC_00617 - conserved hypothetical protein {Staphylococcus aure   | 393.8 ± 35  | 248.3 ± 90  | 293 ± 73    | 126 ± 17          | 1.6 | 1.3 | 3.1  | 0.000241 |
| SAOUHSC_00634 - ABC transporter, substrate-binding protein, putative  | 218.5 ± 28  | 204.5 ± 17  | 201.5 ± 50  | 98.3 ± 20         | 1.1 | 1.1 | 2.2  | 0.006735 |
| SAOUHSC_00671 - secretory antigen SsaA-like protein {Staphylococcus   | 282.3 ± 34  | 284 ± 77    | 319.8 ± 76  | 235.5 ± 75        | 1.0 | 0.9 | 1.2  | 0.296007 |
| SAOUHSC_00707 - fructose 1-phosphate kinase, putative [2.7.1.56] {St  | 20.3 ± 4    | 33 ± 7      | 29.8 ± 4    | 3 ± 1             | 0.6 | 0.7 | 6.8  | 0.002919 |
| SAOUHSC_00717 - conserved hypothetical protein {Staphylococcus aure   | 85 ± 36     | 53.5 ± 16   | 78.5 ± 29   | 31 ± 5            | 1.6 | 1.1 | 2.7  | 0.092660 |
| SAOUHSC_00728 - lipoteichoic acid synthase                            | 451.8 ± 44  | 155.8 ± 43  | 172.3 ± 43  | 90 ± 22           | 2.9 | 2.6 | 5.0  | 0.000159 |
| SAOUHSC_00743 - ribonucleotide-disphosphate reductase beta chain, pu  | 15.8 ± 2    | 25.5 ± 2    | 22.5 ± 2    | 9 ± 2             | 0.6 | 0.7 | 1.8  | 0.050907 |
| SAOUHSC_00767 - conserved hypothetical protein {Staphylococcus aure   | 26.5 ± 7    | 64 ± 11     | 51.8 ± 9    | 10 ± 1            | 0.4 | 0.5 | 2.7  | 0.024495 |
| SAOUHSC_00785 - thioredoxin reductase [1.6.4.5] {Staphylococcus aur   | 30 ± 9      | 77.5 ± 18   | 66 ± 10     | 21.3 ± 6          | 0.4 | 0.5 | 1.4  | 0.218755 |
| SAOUHSC_00795 - glyceraldehyde-3-phosphate dehydrogenase, type I [    | 383.5 ± 104 | 879.3 ± 210 | 474.8 ± 59  | 80.3 ± 19         | 0.4 | 0.8 | 4.8  | 0.014263 |
| SAOUHSC_00796 - phosphoglycerate kinase, putative [2.7.2.3] {Staphy   | 52 ± 12     | 152.5 ± 63  | 71 ± 11     | 18.5 ± 2          | 0.3 | 0.7 | 2.8  | 0.017025 |
| SAOUHSC_00797 - triosephosphate isomerase [5.3.1.1] {Staphylococcu:   | 83.3 ± 25   | 299.3 ± 83  | 381.8 ± 96  | 43.5 ± 14         | 0.3 | 0.2 | 1.9  | 0.106136 |
| SAOUHSC_00798 - phosphoglycerate mutase, 2,3-bisphosphoglycerate-i    | 31.8 ± 4    | 72.3 ± 10   | 54.5 ± 10   | 16 ± 3            | 0.4 | 0.6 | 2.0  | 0.010223 |
| SAOUHSC_00799 - enolase [4.2.1.11] {Staphylococcus aureus NCTC 83:    | 323 ± 60    | 787.3 ± 169 | 534.8 ± 100 | 98.8 ± 24         | 0.4 | 0.6 | 3.3  | 0.006472 |
| SAOUHSC_00808 - conserved hypothetical protein {Staphylococcus aure   | 13 ± 2      | 32.8 ± 10   | 39.8 ± 13   | 12.3 ± 2          | 0.4 | 0.3 | 1.1  | 0.404925 |
| SAOUHSC_00812 - clumping factor {Staphylococcus aureus NCTC 8325}     | 12.8 ± 2    | 9 ± 1       | 18 ± 5      | 13 ± 3            | 1.4 | 0.7 | 1.0  | 0.474354 |
| SAOUHSC_00818 - thermonuclease precursor [3.1.31.1] {Staphylococcu    | 58.5 ± 14   | 18.5 ± 5    | 11.3 ± 2    | 13 ± 2            | 3.2 | 5.2 | 4.5  | 0.008202 |
| SAOUHSC_00836 - glycine cleavage system H protein {Staphylococcus a   | 27 ± 10     | 144 ± 41    | 123.8 ± 38  | 33.8 ± 10         | 0.2 | 0.2 | 0.8  | 0.327848 |
| SAOUHSC_00847 - ABC transporter, ATP-binding protein, putative {Stap  | 10 ± 1      | 26 ± 14     | 26 ± 9      | 3.3 ± 1           | 0.4 | 0.4 | 3.1  | 0.002383 |
| SAOUHSC_00848 - conserved hypothetical protein {Staphylococcus aure   | 17 ± 2      | 37.8 ± 5    | 26 ± 6      | 2 ± 1             | 0.5 | 0.7 | 8.5  | 0.000200 |
| SAOUHSC_00849 - aminotransferase, class V superfamily, putative {Sta  | 12.8 ± 3    | 25.5 ± 7    | 25.3 ± 5    | 0.5 ± 1           | 0.5 | 0.5 | 25.5 | 0.004096 |

|                                                                         |              |            |             |                   |     |     |      |          |
|-------------------------------------------------------------------------|--------------|------------|-------------|-------------------|-----|-----|------|----------|
| SAOUHSC_00851 - conserved hypothetical protein {Staphylococcus aure     | 21 ± 2       | 36.8 ± 4   | 32.5 ± 3    | 4.8 ± 2           | 0.6 | 0.6 | 4.4  | 0.000834 |
| SAOUHSC_00869 - D-alanine-activating enzyme [6.3.2.-] {Staphylococc     | 19 ± 4       | 72.3 ± 15  | 41.3 ± 4    | 14.5 ± 4          | 0.3 | 0.5 | 1.3  | 0.214830 |
| SAOUHSC_00878 - conserved hypothetical protein {Staphylococcus aure     | 23.3 ± 3     | 51.3 ± 27  | 31.8 ± 6    | 5 ± 2             | 0.5 | 0.7 | 4.7  | 0.001361 |
| SAOUHSC_00879 - probable cytosol aminopeptidase {Staphylococcus au      | 13.3 ± 3     | 23 ± 5     | 16.3 ± 2    | 4 ± 1             | 0.6 | 0.8 | 3.3  | 0.008650 |
| SAOUHSC_00891 - peptidyl-prolyl cis-trans isomerase, cyclophilin-type,  | 15 ± 3       | 30.5 ± 4   | 25 ± 8      | 3.5 ± 1           | 0.5 | 0.6 | 4.3  | 0.005538 |
| SAOUHSC_00895 - glutamate dehydrogenase, NAD-specific, putative {S      | 20 ± 3       | 32.5 ± 6   | 26.5 ± 6    | 7.8 ± 3           | 0.6 | 0.8 | 2.6  | 0.020647 |
| SAOUHSC_00897 - putative glutamyl endopeptidase precursor               | 180.3 ± 32   | 57.8 ± 6   | 77.8 ± 15   | 62.5 ± 25         | 3.1 | 2.3 | 2.9  | 0.013822 |
| SAOUHSC_00900 - glucose-6-phosphate isomerase [5.3.1.9] {Staphyloc      | 56 ± 8       | 131.5 ± 34 | 109.5 ± 34  | 20.3 ± 4          | 0.4 | 0.5 | 2.8  | 0.003612 |
| SAOUHSC_00906 - conserved hypothetical protein {Staphylococcus aure     | 38.3 ± 4     | 97 ± 38    | 56.5 ± 4    | 14.3 ± 4          | 0.4 | 0.7 | 2.7  | 0.002171 |
| SAOUHSC_00908 - coenzyme A disulfide reductase, putative {Staphyloc     | 24.8 ± 4     | 83 ± 12    | 49.3 ± 10   | 4.8 ± 1           | 0.3 | 0.5 | 5.2  | 0.002544 |
| SAOUHSC_00918 - truncated MHC class II analog protein {Staphylococci    | 194.8 ± 37   | 339 ± 147  | 543.5 ± 102 | 517.3 ± 126       | 0.6 | 0.4 | 0.4  | 0.024948 |
| SAOUHSC_00920 - conserved hypothetical protein {Staphylococcus aure     | 37 ± 13      | 83.5 ± 15  | 56.5 ± 14   | 15.8 ± 3          | 0.4 | 0.7 | 2.3  | 0.081607 |
| SAOUHSC_00921 - 3-oxoacyl- synthase, putative [2.3.1.41] {Staphyloc     | 55.5 ± 9     | 166.5 ± 41 | 141.8 ± 45  | 19.8 ± 5          | 0.3 | 0.4 | 2.8  | 0.005791 |
| SAOUHSC_00927 - oligopeptide ABC transporter, substrate-binding prote   | 10.3 ± 3     | 7.3 ± 1    | 12.5 ± 2    | 9.5 ± 4           | 1.4 | 0.8 | 1.1  | 0.444272 |
| SAOUHSC_00937 - oligoendopeptidase F [3.4.24.-] {Staphylococcus aur     | 25.3 ± 10    | 98.5 ± 13  | 60.3 ± 12   | 16.8 ± 3          | 0.3 | 0.4 | 1.5  | 0.218546 |
| SAOUHSC_00985 - enoyl-CoA hydratase/isomerase family protein, putat     | 12.3 ± 2     | 39.3 ± 6   | 29.8 ± 4    | 1.8 ± 1           | 0.3 | 0.4 | 7.0  | 0.001916 |
| SAOUHSC_00987 - cysteine protease precursor, putative {Staphylococcu    | 637.5 ± 182  | 123 ± 12   | 127 ± 45    | 115 ± 31          | 5.2 | 5.0 | 5.5  | 0.015083 |
| SAOUHSC_00988 - glutamyl endopeptidase precursor, putative {Staphyli    | 589 ± 127    | 191 ± 43   | 229 ± 100   | 142.3 ± 43        | 3.1 | 2.6 | 4.1  | 0.007910 |
| SAOUHSC_00994 - bifunctional autolysin precursor, putative [3.5.1.28] { | 1255.5 ± 170 | 346 ± 113  | 443 ± 109   | 322.8 ± 86        | 3.6 | 2.8 | 3.9  | 0.001373 |
| SAOUHSC_00997 - conserved hypothetical protein {Staphylococcus aure     | 25.5 ± 1     | 22.8 ± 4   | 35 ± 4      | 38 ± 9            | 1.1 | 0.7 | 0.7  | 0.102404 |
| SAOUHSC_01002 - quinol oxidase AA3, subunit II, putative [1.9.3.-] {St  | 13.5 ± 3     | 19.3 ± 5   | 20.3 ± 2    | 8.3 ± 3           | 0.7 | 0.7 | 1.6  | 0.133892 |
| SAOUHSC_01005 - conserved hypothetical protein {Staphylococcus aure     | 128 ± 38     | 254.3 ± 47 | 609.5 ± 75  | 585.5 ± 120       | 0.5 | 0.2 | 0.2  | 0.005406 |
| SAOUHSC_01007 - FoLD bifunctional protein, putative {Staphylococcus a   | 23.3 ± 4     | 45.8 ± 11  | 37.8 ± 9    | 6.3 ± 1           | 0.5 | 0.6 | 3.7  | 0.003221 |
| SAOUHSC_01012 - phosphoribosylformylglycinamide synthase I [6.3.5       | 12 ± 3       | 31.3 ± 3   | 31 ± 7      | 13 ± 4            | 0.4 | 0.4 | 0.9  | 0.422236 |
| SAOUHSC_01013 - phosphoribosylformylglycinamide synthase II [6.3.!      | 17.8 ± 3     | 27.8 ± 6   | 23.8 ± 6    | 13.3 ± 4          | 0.6 | 0.7 | 1.3  | 0.181795 |
| SAOUHSC_01014 - amidophosphoribosyltransferase [2.4.2.14] {Staphyli     | 11.3 ± 2     | 25 ± 1     | 22.8 ± 3    | 2.3 ± 2           | 0.5 | 0.5 | 5.0  | 0.012764 |
| SAOUHSC_01015 - phosphoribosylformylglycinamide cyclo-ligase [6.3.      | 16.8 ± 2     | 31.5 ± 7   | 16.3 ± 4    | 2.5 ± 2           | 0.5 | 1.0 | 6.7  | 0.001235 |
| SAOUHSC_01017 - phosphoribosylaminoimidazolecarboxamide formyltra       | 14.3 ± 3     | 7.3 ± 1    | 8 ± 3       | 4.3 ± 3           | 2.0 | 1.8 | 3.4  | 0.025639 |
| SAOUHSC_01028 - phosphocarrier protein hpr, putative {Staphylococcus    | 53.3 ± 10    | 299 ± 110  | 244.3 ± 64  | 54.8 ± 17         | 0.2 | 0.2 | 1.0  | 0.470960 |
| SAOUHSC_01029 - phosphoenolpyruvate-protein phosphotransferase [2.      | 60.3 ± 4     | 110 ± 25   | 91.5 ± 14   | 21 ± 5            | 0.5 | 0.7 | 2.9  | 0.000405 |
| SAOUHSC_01035 - conserved hypothetical protein {Staphylococcus aure     | 10 ± 7       | 23 ± 11    | 10.8 ± 5    | 0.5 ± 1           | 0.4 | 0.9 | 20.0 | 0.104517 |
| SAOUHSC_01040 - pyruvate dehydrogenase complex, E1 component, alj       | 54 ± 7       | 137.5 ± 55 | 115.5 ± 42  | 19.5 ± 6          | 0.4 | 0.5 | 2.8  | 0.005605 |
| SAOUHSC_01041 - pyruvate dehydrogenase complex, E1 component, py        | 29.5 ± 3     | 109 ± 16   | 66 ± 14     | 27.3 ± 8          | 0.3 | 0.4 | 1.1  | 0.396672 |
| SAOUHSC_01042 - dihydrolipoamide S-acetyltransferase component of p     | 27.5 ± 10    | 84.3 ± 17  | 58.5 ± 9    | 14.3 ± 3          | 0.3 | 0.5 | 1.9  | 0.115985 |
| SAOUHSC_01043 - dihydrolipoamide dehydrogenase [1.8.1.4] {Staphyloc     | 95 ± 31      | 159.8 ± 20 | 89 ± 18     | 37.3 ± 12         | 0.6 | 1.1 | 2.6  | 0.067062 |
| SAOUHSC_01064 - pyruvate carboxylase [6.4.1.1] {Staphylococcus aure     | 109.8 ± 18   | 158.3 ± 17 | 143 ± 17    | 29.5 ± 9          | 0.7 | 0.8 | 3.7  | 0.003321 |
| SAOUHSC_01081 - conserved hypothetical protein {Staphylococcus aure     | 34.3 ± 4     | 29.3 ± 7   | 35 ± 8      | 20.8 ± 6          | 1.2 | 1.0 | 1.7  | 0.061707 |
| SAOUHSC_01093 - phenylalanyl-tRNA synthetase, beta subunit [6.1.1.2]    | 24.8 ± 8     | 49.8 ± 8   | 44.5 ± 12   | 19.3 ± 7          | 0.5 | 0.6 | 1.3  | 0.306576 |
| SAOUHSC_01100 - thioredoxin {Staphylococcus aureus NCTC 8325} xxx       | 19.3 ± 9     | 36.5 ± 14  | 59.8 ± 30   | 17.5 ± 5          | 0.5 | 0.3 | 1.1  | 0.434586 |
| SAOUHSC_01107 - conserved hypothetical protein {Staphylococcus aure     | 10.3 ± 1     | 10.3 ± 2   | 13 ± 6      | 6.3 ± 4           | 1.0 | 0.8 | 1.6  | 0.165373 |
| SAOUHSC_01114 - fibrinogen-binding protein {Staphylococcus aureus N     | 69.8 ± 31    | 32.3 ± 10  | 41.8 ± 11   | 14.8 ± 5          | 2.2 | 1.7 | 4.7  | 0.065921 |
| SAOUHSC_01121 - alpha-hemolysin precursor {Staphylococcus aureus N      | 1683.8 ± 436 | 400.8 ± 85 | 673.3 ± 125 | 269.8 ± 102       | 4.2 | 2.5 | 6.2  | 0.009854 |
| SAOUHSC_01125 - superantigen-like proten                                | 11.5 ± 2     | 1.5 ± 1    | 2.5 ± 1     | n.d. <sup>c</sup> | 7.7 | 4.6 | -    | 0.001110 |
| SAOUHSC_01135 - conserved hypothetical protein {Staphylococcus aure     | 12.3 ± 7     | 1.5 ± 1    | n.d.        | 0.5 ± 1           | 8.2 | -   | 24.5 | 0.070375 |

|                                                                        |            |            |             |                   |     |     |      |          |
|------------------------------------------------------------------------|------------|------------|-------------|-------------------|-----|-----|------|----------|
| SAOUHSC_01145 - penicillin-binding protein 1 {Staphylococcus aureus N  | 20.5 ± 3   | 28.8 ± 2   | 33 ± 5      | 33.5 ± 10         | 0.7 | 0.6 | 0.6  | 0.124429 |
| SAOUHSC_01149 - cell division protein, putative {Staphylococcus aureus | 20 ± 3     | 53.8 ± 7   | 56 ± 9      | 23 ± 6            | 0.4 | 0.4 | 0.9  | 0.334638 |
| SAOUHSC_01150 - cell division protein FtsZ {Staphylococcus aureus NC   | 24 ± 8     | 50.3 ± 22  | 31.8 ± 8    | 21.5 ± 8          | 0.5 | 0.8 | 1.1  | 0.414766 |
| SAOUHSC_01159 - isoleucyl-tRNA synthetase [6.1.1.5] {Staphylococcus    | 48.3 ± 8   | 98.8 ± 27  | 67.8 ± 8    | 20.3 ± 6          | 0.5 | 0.7 | 2.4  | 0.015331 |
| SAOUHSC_01168 - dihydroorotase [3.5.2.3] {Staphylococcus aureus NC     | 31 ± 7     | 66.8 ± 4   | 46.5 ± 10   | 11.8 ± 3          | 0.5 | 0.7 | 2.6  | 0.019737 |
| SAOUHSC_01169 - carbamoyl-phosphate synthase, small subunit [6.3.5     | 10.8 ± 1   | 13.8 ± 6   | 6.8 ± 4     | n.d. <sup>c</sup> | 0.8 | 1.6 | -    | 0.000035 |
| SAOUHSC_01170 - carbamoyl-phosphate synthase, large subunit [6.3.5.    | 29.3 ± 6   | 57.3 ± 12  | 42 ± 3      | 7.8 ± 4           | 0.5 | 0.7 | 3.8  | 0.012275 |
| SAOUHSC_01172 - orotate phosphoribosyltransferase [2.4.2.10] {Staph    | 16.5 ± 1   | 20.8 ± 3   | 19.3 ± 3    | 2 ± 1             | 0.8 | 0.9 | 8.3  | 0.000022 |
| SAOUHSC_01180 - conserved hypothetical protein {Staphylococcus aure    | 10.8 ± 2   | 11.5 ± 4   | 20.8 ± 10   | 11 ± 2            | 0.9 | 0.5 | 1.0  | 0.469621 |
| SAOUHSC_01193 - conserved hypothetical protein {Staphylococcus aure    | 11.5 ± 2   | 22.5 ± 10  | 15 ± 5      | 10 ± 5            | 0.5 | 0.8 | 1.2  | 0.395983 |
| SAOUHSC_01199 - 3-oxoacyl-(acyl-carrier-protein) reductase, putative [ | 45.8 ± 8   | 87.3 ± 25  | 74.3 ± 10   | 17.8 ± 4          | 0.5 | 0.6 | 2.6  | 0.010019 |
| SAOUHSC_01216 - succinyl-CoA synthetase, beta subunit, putative [6.2.  | 27.3 ± 7   | 65 ± 8     | 48.5 ± 10   | 18.8 ± 7          | 0.4 | 0.6 | 1.5  | 0.215009 |
| SAOUHSC_01218 - succinyl-CoA synthetase, alpha subunit, putative [6.2  | 24 ± 4     | 45.8 ± 4   | 32.8 ± 5    | 11.8 ± 4          | 0.5 | 0.7 | 2.0  | 0.032301 |
| SAOUHSC_01228 - conserved hypothetical protein {Staphylococcus aure    | 22.3 ± 5   | 24 ± 5     | 28.3 ± 7    | 1.8 ± 1           | 0.9 | 0.8 | 12.7 | 0.003118 |
| SAOUHSC_01232 - ribosomal protein S2 {Staphylococcus aureus NCTC 8     | 18.3 ± 4   | 45.3 ± 4   | 30.3 ± 4    | n.d. <sup>c</sup> | 0.4 | 0.6 | -    | 0.003334 |
| SAOUHSC_01234 - translation elongation factor Ts {Staphylococcus aure  | 46.5 ± 11  | 139 ± 20   | 129.3 ± 42  | 28.8 ± 6          | 0.3 | 0.4 | 1.6  | 0.107001 |
| SAOUHSC_01243 - transcription termination-antitermination factor, puta | 27.5 ± 6   | 39.3 ± 6   | 33.8 ± 5    | 24.5 ± 8          | 0.7 | 0.8 | 1.1  | 0.383231 |
| SAOUHSC_01251 - polyribonucleotide nucleotidyltransferase, putative [2 | 42 ± 2     | 90.5 ± 21  | 75 ± 12     | 28.3 ± 8          | 0.5 | 0.6 | 1.5  | 0.073727 |
| SAOUHSC_01278 - conserved hypothetical protein {Staphylococcus aure    | 20.5 ± 3   | 50.5 ± 8   | 37 ± 5      | 6.5 ± 1           | 0.4 | 0.6 | 3.2  | 0.001497 |
| SAOUHSC_01287 - glutamine synthetase, type I [6.3.1.2] {Staphylococ    | 53.3 ± 5   | 105.8 ± 25 | 102.3 ± 27  | 18.5 ± 6          | 0.5 | 0.5 | 2.9  | 0.001493 |
| SAOUHSC_01327 - catalase [1.11.1.6] {Staphylococcus aureus NCTC 83     | 32.3 ± 3   | 66.8 ± 8   | 46.5 ± 6    | 17.3 ± 6          | 0.5 | 0.7 | 1.9  | 0.036733 |
| SAOUHSC_01332 - conserved hypothetical protein {Staphylococcus aure    | 16.5 ± 3   | 4.3 ± 2    | 8.8 ± 6     | 4.3 ± 3           | 3.9 | 1.9 | 3.9  | 0.012668 |
| SAOUHSC_01337 - transketolase [2.2.1.1] {Staphylococcus aureus NCTC    | 92.8 ± 16  | 273.5 ± 35 | 196 ± 33    | 45.5 ± 13         | 0.3 | 0.5 | 2.0  | 0.032680 |
| SAOUHSC_01347 - aconitate hydratase 1 [4.2.1.3] {Staphylococcus aur    | 36.3 ± 6   | 64 ± 4     | 65.8 ± 6    | 12.5 ± 4          | 0.6 | 0.6 | 2.9  | 0.007726 |
| SAOUHSC_01383 - conserved hypothetical protein {Staphylococcus aure    | 14.5 ± 3   | 35.8 ± 4   | 31.5 ± 4    | 4.5 ± 2           | 0.4 | 0.5 | 3.2  | 0.023264 |
| SAOUHSC_01403 - cold shock protein, putative {Staphylococcus aureus    | 158.8 ± 46 | 538.3 ± 88 | 379.3 ± 123 | 166.3 ± 76        | 0.3 | 0.4 | 1.0  | 0.467806 |
| SAOUHSC_01418 - 2-oxoglutarate dehydrogenase, E1 component [1.2.4      | 11.8 ± 4   | 19.3 ± 5   | 15 ± 2      | 1.3 ± 1           | 0.6 | 0.8 | 9.4  | 0.022120 |
| SAOUHSC_01427 - conserved hypothetical protein {Staphylococcus aure    | 13.8 ± 5   | 12.3 ± 3   | 18 ± 3      | 24.5 ± 7          | 1.1 | 0.8 | 0.6  | 0.137990 |
| SAOUHSC_01430 - phosphotransferase system enzyme IIA, putative {St     | 14.5 ± 5   | 41.5 ± 11  | 48.3 ± 20   | 18.5 ± 7          | 0.3 | 0.3 | 0.8  | 0.329167 |
| SAOUHSC_01451 - threonine dehydratase [4.2.1.16] {Staphylococcus ai    | 15.8 ± 4   | 23.3 ± 11  | 13 ± 3      | n.d. <sup>c</sup> | 0.7 | 1.2 | -    | 0.002765 |
| SAOUHSC_01452 - alanine dehydrogenase [1.4.1.1] {Staphylococcus au     | 14.8 ± 4   | 28.8 ± 2   | 26.3 ± 5    | 6 ± 2             | 0.5 | 0.6 | 2.5  | 0.036430 |
| SAOUHSC_01467 - penicillin-binding protein 2 {Staphylococcus aureus N  | 53.8 ± 7   | 67.5 ± 6   | 70.5 ± 9    | 65.3 ± 12         | 0.8 | 0.8 | 0.8  | 0.225083 |
| SAOUHSC_01471 - asparaginyl-tRNA synthetase, putative [6.1.1.22] {St   | 14.5 ± 2   | 35.8 ± 11  | 16 ± 4      | n.d.              | 0.4 | 0.9 | -    | 0.000395 |
| SAOUHSC_01490 - DNA-binding protein HU, putative {Staphylococcus ai    | 16 ± 4     | 77.3 ± 39  | 31.8 ± 6    | 9.5 ± 1           | 0.2 | 0.5 | 1.7  | 0.099367 |
| SAOUHSC_01493 - 30S ribosomal protein S1, putative {Staphylococcus     | 43.3 ± 6   | 124.3 ± 24 | 89.8 ± 12   | 48.8 ± 8          | 0.3 | 0.5 | 0.9  | 0.297095 |
| SAOUHSC_01501 - elastin binding protein {Staphylococcus aureus NCTC    | 18 ± 3     | 22 ± 4     | 28.5 ± 7    | 19.3 ± 6          | 0.8 | 0.6 | 0.9  | 0.423883 |
| SAOUHSC_01584 - conserved hypothetical protein {Staphylococcus aure    | 26.5 ± 6   | 18 ± 2     | 16.8 ± 2    | 5.8 ± 2           | 1.5 | 1.6 | 4.6  | 0.008901 |
| SAOUHSC_01599 - glucose-6-phosphate 1-dehydrogenase [1.1.1.49] {S      | 20 ± 2     | 40.5 ± 5   | 26.8 ± 6    | 1.5 ± 1           | 0.5 | 0.7 | 13.3 | 0.000060 |
| SAOUHSC_01605 - 6-phosphogluconate dehydrogenase, decarboxylating      | 57.3 ± 5   | 127.5 ± 18 | 100.5 ± 22  | 26.8 ± 12         | 0.4 | 0.6 | 2.1  | 0.027492 |
| SAOUHSC_01622 - conserved hypothetical protein {Staphylococcus aure    | 11 ± 6     | 6.8 ± 4    | 4.5 ± 1     | n.d. <sup>c</sup> | 1.6 | 2.4 | -    | 0.051654 |
| SAOUHSC_01625 - translation elongation factor P {Staphylococcus aure   | 19.3 ± 5   | 68.3 ± 22  | 60.5 ± 10   | 13.5 ± 5          | 0.3 | 0.3 | 1.4  | 0.229131 |
| SAOUHSC_01626 - proline dipeptidase, putative [3.4.13.9] {Staphylococ  | 21.3 ± 4   | 69.8 ± 16  | 50.3 ± 10   | 10.5 ± 2          | 0.3 | 0.4 | 2.0  | 0.024309 |
| SAOUHSC_01652 - penicillin-binding protein 3 {Staphylococcus aureus N  | 50.5 ± 5   | 15.3 ± 1   | 27 ± 5      | 23.3 ± 5          | 3.3 | 1.9 | 2.2  | 0.002851 |
| SAOUHSC_01652 - penicillin-binding protein 3 {Staphylococcus aureus N  | 50.5 ± 5   | 15.3 ± 1   | 27 ± 5      | 23.3 ± 5          | 3.3 | 1.9 | 2.2  | 0.002851 |

|                                                                        |             |                   |                   |                   |      |      |      |          |
|------------------------------------------------------------------------|-------------|-------------------|-------------------|-------------------|------|------|------|----------|
| SAOUHSC_01653 - superoxide dismutase, Mn, putative [1.15.1.1] {Stap    | 24.3 ± 4    | 69.8 ± 26         | 35.5 ± 4          | 7 ± 1             | 0.3  | 0.7  | 3.5  | 0.002413 |
| SAOUHSC_01666 - glycyl-tRNA synthetase [6.1.1.14] {Staphylococcus a    | 34.3 ± 9    | 108.5 ± 56        | 74.3 ± 27         | 5.8 ± 2           | 0.3  | 0.5  | 6.0  | 0.009254 |
| SAOUHSC_01683 - DNaK protein, putative {Staphylococcus aureus NCTC     | 86 ± 21     | 194 ± 52          | 118.5 ± 10        | 73 ± 16           | 0.4  | 0.7  | 1.2  | 0.319233 |
| SAOUHSC_01722 - alanyl-tRNA synthetase [6.1.1.7] {Staphylococcus au    | 13 ± 3      | 31.5 ± 2          | 23 ± 5            | n.d. <sup>c</sup> | 0.4  | 0.6  | -    | 0.001417 |
| SAOUHSC_01737 - aspartyl-tRNA synthetase [6.1.1.12] {Staphylococcu:    | 13.3 ± 0    | 25.8 ± 10         | 16.8 ± 4          | n.d. <sup>c</sup> | 0.5  | 0.8  | -    | 0.000000 |
| SAOUHSC_01757 - ribosomal protein L21 {Staphylococcus aureus NCTC      | 12.5 ± 3    | 42.3 ± 7          | 30.3 ± 2          | 19.5 ± 5          | 0.3  | 0.4  | 0.6  | 0.129959 |
| SAOUHSC_01759 - rod shape-determining protein MreC {Staphylococcus:    | 27.8 ± 6    | 23.8 ± 3          | 47.8 ± 7          | 33.3 ± 11         | 1.2  | 0.6  | 0.8  | 0.335143 |
| SAOUHSC_01767 - valyl-tRNA synthetase [6.1.1.9] {Staphylococcus aur    | 28 ± 6      | 63.8 ± 7          | 50.3 ± 9          | 10.5 ± 5          | 0.4  | 0.6  | 2.7  | 0.030432 |
| SAOUHSC_01772 - porphobilinogen synthase [4.2.1.24] {Staphylococcu:    | 12.3 ± 3    | 27 ± 5            | 22.3 ± 6          | 4.8 ± 4           | 0.5  | 0.6  | 2.6  | 0.090088 |
| SAOUHSC_01779 - trigger factor [5.2.1.8] {Staphylococcus aureus NCTC   | 24 ± 2      | 139.5 ± 37        | 83.8 ± 16         | 28.5 ± 4          | 0.2  | 0.3  | 0.8  | 0.185071 |
| SAOUHSC_01788 - threonyl-tRNA synthetase [6.1.1.3] {Staphylococcus     | 12.5 ± 3    | 39.5 ± 17         | 24.8 ± 11         | 1.8 ± 2           | 0.3  | 0.5  | 7.1  | 0.008258 |
| SAOUHSC_01806 - pyruvate kinase [2.7.1.40] {Staphylococcus aureus P    | 95 ± 4      | 128.5 ± 26        | 118.5 ± 24        | 28.8 ± 10         | 0.7  | 0.8  | 3.3  | 0.000462 |
| SAOUHSC_01807 - 6-phosphofructokinase, putative [2.7.1.11] {Staphyl    | 16.8 ± 3    | 31.3 ± 2          | 34.3 ± 9          | 7.5 ± 2           | 0.5  | 0.5  | 2.2  | 0.014449 |
| SAOUHSC_01810 - NADP-dependent malic enzyme, putative {Staphyloc       | 29.5 ± 6    | 57 ± 13           | 50.5 ± 10         | 9.5 ± 2           | 0.5  | 0.6  | 3.1  | 0.012915 |
| SAOUHSC_01816 - conserved hypothetical protein {Staphylococcus aure    | 15.5 ± 3    | 25.5 ± 5          | 22.3 ± 7          | n.d. <sup>c</sup> | 0.6  | 0.7  | -    | 0.001381 |
| SAOUHSC_01819 - conserved hypothetical protein {Staphylococcus aure    | 40.5 ± 11   | 127 ± 55          | 58.3 ± 13         | 20 ± 3            | 0.3  | 0.7  | 2.0  | 0.067083 |
| SAOUHSC_01820 - acetate kinase [2.7.2.1] {Staphylococcus aureus NC     | 38.8 ± 3    | 57.5 ± 39         | 39.5 ± 22         | 0.8 ± 1           | 0.7  | 1.0  | 51.7 | 0.000015 |
| SAOUHSC_01822 - conserved hypothetical protein {Staphylococcus aure    | 14.3 ± 7    | 48.8 ± 20         | 41.3 ± 16         | 12.8 ± 6          | 0.3  | 0.3  | 1.1  | 0.438451 |
| SAOUHSC_01839 - tyrosyl-tRNA synthetase [6.1.1.1] {Staphylococcus a    | 11.3 ± 4    | 25 ± 5            | 26.8 ± 5          | 1 ± 1             | 0.5  | 0.4  | 11.3 | 0.028621 |
| SAOUHSC_01845 - formate-tetrahydrofolate ligase, putative [6.3.4.3] {  | 65 ± 8      | 109.5 ± 16        | 73.8 ± 12         | 21.5 ± 5          | 0.6  | 0.9  | 3.0  | 0.001972 |
| SAOUHSC_01850 - catabolite control protein A {Staphylococcus aureus I  | 13.8 ± 2    | 34.3 ± 3          | 25.5 ± 3          | 0.8 ± 1           | 0.4  | 0.5  | 18.3 | 0.000343 |
| SAOUHSC_01858 - conserved hypothetical protein {Staphylococcus aure    | 10.8 ± 5    | 18.3 ± 2          | 16.3 ± 4          | 8.8 ± 5           | 0.6  | 0.7  | 1.2  | 0.386756 |
| SAOUHSC_01861 - conserved hypothetical protein {Staphylococcus aure    | 12 ± 3      | 29.3 ± 2          | 21.3 ± 2          | 3.8 ± 1           | 0.4  | 0.6  | 3.2  | 0.019725 |
| SAOUHSC_01867 - D-amino acid aminotransferase [2.6.1.21] {Staphylo     | 15.8 ± 3    | 33.8 ± 7          | 25 ± 5            | 5 ± 3             | 0.5  | 0.6  | 3.2  | 0.026646 |
| SAOUHSC_01868 - conserved hypothetical protein {Staphylococcus aure    | 27.3 ± 4    | 80.8 ± 10         | 61.8 ± 8          | 26 ± 4            | 0.3  | 0.4  | 1.0  | 0.418159 |
| SAOUHSC_01875 - leucyl-tRNA synthetase [6.1.1.4] {Staphylococcus au    | 26.3 ± 3    | 48.8 ± 4          | 44 ± 8            | 9.3 ± 3           | 0.5  | 0.6  | 2.8  | 0.003663 |
| SAOUHSC_01895 - conserved hypothetical protein {Staphylococcus aure    | 12.8 ± 4    | 10.3 ± 1          | 9.8 ± 1           | 5.8 ± 2           | 1.2  | 1.3  | 2.2  | 0.094348 |
| SAOUHSC_01901 - conserved hypothetical protein {Staphylococcus aure    | 27 ± 5      | 113 ± 50          | 87.5 ± 22         | 18.8 ± 4          | 0.2  | 0.3  | 1.4  | 0.121399 |
| SAOUHSC_01910 - phosphoenolpyruvate carboxykinase (ATP) [4.1.1.49]     | 14 ± 4      | 41 ± 3            | 30 ± 5            | 8.3 ± 3           | 0.3  | 0.5  | 1.7  | 0.167969 |
| SAOUHSC_01935 - serine protease SplF, putative [3.4.21.19] {Staphylo   | 342 ± 82    | 56 ± 5            | 61.8 ± 9          | 22 ± 9            | 6.1  | 5.5  | 15.5 | 0.004060 |
| SAOUHSC_01936 - serine protease SplE [3.4.21.19] {Staphylococcus au    | 256.8 ± 46  | 15.8 ± 1          | 12.3 ± 2          | 4.3 ± 3           | 16.3 | 21.0 | 60.4 | 0.000809 |
| SAOUHSC_01938 - serine protease SplD [3.4.21.19] {Staphylococcus au    | 179.5 ± 39  | 40 ± 6            | 42.5 ± 4          | 19.5 ± 7          | 4.5  | 4.2  | 9.2  | 0.003508 |
| SAOUHSC_01939 - serine protease SplC {Staphylococcus aureus NCTC 8     | 98.5 ± 61   | 18.5 ± 2          | 17.8 ± 3          | 10.8 ± 5          | 5.3  | 5.5  | 9.2  | 0.099803 |
| SAOUHSC_01941 - serine protease SplB {Staphylococcus aureus NCTC 8     | 257.5 ± 79  | 54.5 ± 8          | 50.8 ± 9          | 30.5 ± 13         | 4.7  | 5.1  | 8.4  | 0.015220 |
| SAOUHSC_01942 - serine protease SplA [3.4.21.19] {Staphylococcus au    | 272.3 ± 122 | 45.8 ± 36         | 38 ± 24           | 10 ± 4            | 6.0  | 7.2  | 27.2 | 0.037866 |
| SAOUHSC_01944 - conserved hypothetical protein {Staphylococcus aure    | 14.5 ± 8    | 14.8 ± 8          | 12 ± 2            | 7.5 ± 2           | 1.0  | 1.2  | 1.9  | 0.204410 |
| SAOUHSC_01949 - intracellular serine protease, putative {Staphylococci | 11.8 ± 4    | n.d. <sup>c</sup> | n.d. <sup>c</sup> | n.d. <sup>c</sup> | -    | -    | -    | 0.009645 |
| SAOUHSC_01954 - leukotoxin, LukD {Staphylococcus aureus NCTC 8325      | 279.3 ± 16  | 44.8 ± 10         | 79.5 ± 12         | 26.8 ± 8          | 6.2  | 3.5  | 10.4 | 0.000004 |
| SAOUHSC_01964 - conserved hypothetical protein {Staphylococcus aure    | 11.3 ± 3    | 29 ± 4            | 27.3 ± 3          | 6.8 ± 3           | 0.4  | 0.4  | 1.7  | 0.182678 |
| SAOUHSC_01972 - protein export protein PrsA, putative {Staphylococcu   | 17.5 ± 2    | 80.3 ± 20         | 80.5 ± 19         | 137.5 ± 28        | 0.2  | 0.2  | 0.1  | 0.002662 |
| SAOUHSC_02043 - phage head protein, putative {Staphylococcus aureu:    | 33.3 ± 2    | 25.8 ± 7          | 33 ± 7            | 27 ± 9            | 1.3  | 1.0  | 1.2  | 0.255084 |
| SAOUHSC_02071 - single-strand DNA-binding protein, putative {Staphyl   | 20.3 ± 3    | 12 ± 2            | 17 ± 2            | 13 ± 4            | 1.7  | 1.2  | 1.6  | 0.098863 |
| SAOUHSC_02092 - aminopeptidase PepS, putative [3.4.11.-] {Staphyloc    | 20.3 ± 5    | 48 ± 4            | 45 ± 4            | 15.3 ± 4          | 0.4  | 0.5  | 1.3  | 0.241625 |
| SAOUHSC_02108 - ferritin, putative {Staphylococcus aureus NCTC 8325    | 10 ± 3      | 24.3 ± 4          | 15.8 ± 3          | 6.8 ± 3           | 0.4  | 0.6  | 1.5  | 0.225300 |

|                                                                       |             |             |            |                   |     |     |      |          |
|-----------------------------------------------------------------------|-------------|-------------|------------|-------------------|-----|-----|------|----------|
| SAOUHSC_02116 - glutamyl-tRNA(Gln) amidotransferase, B subunit [6.3   | 16.3 ± 3    | 42.3 ± 10   | 39.5 ± 12  | 7 ± 2             | 0.4 | 0.4 | 2.3  | 0.023377 |
| SAOUHSC_02117 - glutamyl-tRNA(Gln) amidotransferase, A subunit [6.3   | 17.8 ± 1    | 52.5 ± 21   | 34.5 ± 6   | 6.3 ± 1           | 0.3 | 0.5 | 2.8  | 0.000027 |
| SAOUHSC_02127 - staphopain thiol proteinase [3.4.22.48] {Staphylococ  | 405.8 ± 104 | 85 ± 11     | 114 ± 47   | 42.3 ± 10         | 4.8 | 3.6 | 9.6  | 0.006477 |
| SAOUHSC_02133 - nicotinate phosphoribosyltransferase, putative [2.4.2 | 11.5 ± 5    | 29.5 ± 3    | 20.3 ± 7   | n.d. <sup>c</sup> | 0.4 | 0.6 | -    | 0.029109 |
| SAOUHSC_02140 - conserved hypothetical protein {Staphylococcus aure   | 14.8 ± 4    | 28.3 ± 3    | 19.3 ± 3   | 13.3 ± 5          | 0.5 | 0.8 | 1.1  | 0.411064 |
| SAOUHSC_02161 - MHC class II analog protein {Staphylococcus aureus    | 23.3 ± 3    | 163 ± 81    | 79.8 ± 22  | 55.5 ± 18         | 0.1 | 0.3 | 0.4  | 0.067555 |
| SAOUHSC_02163 - conserved hypothetical phage protein {Staphylococci   | 15.3 ± 2    | 15 ± 2      | 34.3 ± 12  | 17 ± 8            | 1.0 | 0.4 | 0.9  | 0.415340 |
| SAOUHSC_02167 - conserved hypothetical phage protein {Staphylococci   | 30.5 ± 11   | 52 ± 21     | 50 ± 17    | 23.5 ± 6          | 0.6 | 0.6 | 1.3  | 0.299623 |
| SAOUHSC_02169 - conserved hypothetical phage protein {Staphylococci   | 31.3 ± 2    | 38.3 ± 6    | 48 ± 15    | 15 ± 4            | 0.8 | 0.7 | 2.1  | 0.003754 |
| SAOUHSC_02171 - staphylokinase precursor, putative {Staphylococcus a  | 519 ± 29    | 127.3 ± 17  | 116 ± 23   | 79.8 ± 26         | 4.1 | 4.5 | 6.5  | 0.000014 |
| SAOUHSC_02241 - putative leukocidin F subunit like                    | 1083 ± 162  | 169.5 ± 26  | 154.8 ± 44 | 37.5 ± 9          | 6.4 | 7.0 | 28.9 | 0.000331 |
| SAOUHSC_02243 - aerolysin/leukocidin family protein                   | 758 ± 432   | 209 ± 121   | 143.8 ± 57 | 53 ± 11           | 3.6 |     | 14.3 | 0.077032 |
| SAOUHSC_02243 - conserved hypothetical protein {Staphylococcus aure   | 758 ± 432   | 209 ± 121   | 143.8 ± 57 | 53 ± 11           | 3.6 | 5.3 | 14.3 | 0.077032 |
| SAOUHSC_02254 - chaperonin, 60 kDa, GrpEL, putative {Staphylococcu    | 45.5 ± 6    | 81.5 ± 16   | 73.3 ± 8   | 31 ± 6            | 0.6 | 0.6 | 1.5  | 0.071520 |
| SAOUHSC_02257 - conserved hypothetical protein {Staphylococcus aure   | 36 ± 3      | 24 ± 7      | 31.8 ± 10  | 36.8 ± 8          | 1.5 | 1.1 | 1.0  | 0.466694 |
| SAOUHSC_02260 - delta-hemolysin precursor {Staphylococcus aureus N    | 28.8 ± 8    | 10.3 ± 2    | 14 ± 4     | 9 ± 5             | 2.8 | 2.1 | 3.2  | 0.039873 |
| SAOUHSC_02333 - sceD protein, putative {Staphylococcus aureus NCTC    | 34 ± 5      | 36.3 ± 8    | 101 ± 38   | 60.5 ± 21         | 0.9 | 0.3 | 0.6  | 0.128045 |
| SAOUHSC_02341 - ATP synthase F1, beta subunit [3.6.3.14] {Staphyloc   | 24.5 ± 6    | 23.3 ± 1    | 43.3 ± 9   | 19.3 ± 7          | 1.1 | 0.6 | 1.3  | 0.295370 |
| SAOUHSC_02345 - ATP synthase F1, alpha subunit [3.6.3.14] {Staphylo   | 23.8 ± 7    | 21.5 ± 3    | 26.5 ± 3   | 21.5 ± 10         | 1.1 | 0.9 | 1.1  | 0.431408 |
| SAOUHSC_02354 - serine hydroxymethyltransferase, putative [2.1.2.1]   | 17 ± 4      | 32.5 ± 5    | 28 ± 5     | 7 ± 4             | 0.5 | 0.6 | 2.4  | 0.064974 |
| SAOUHSC_02361 - ribosomal protein L31 {Staphylococcus aureus NCTC     | 10.8 ± 3    | 26 ± 5      | 27.3 ± 10  | 1.8 ± 2           | 0.4 | 0.4 | 6.1  | 0.014099 |
| SAOUHSC_02365 - UDP-N-acetylglucosamine 1-carboxyvinyltransferase     | 15.5 ± 3    | 30 ± 3      | 25.5 ± 4   | n.d. <sup>c</sup> | 0.5 | 0.6 | -    | 0.000530 |
| SAOUHSC_02366 - conserved hypothetical protein {Staphylococcus aure   | 54 ± 5      | 264.8 ± 100 | 124.5 ± 24 | 32 ± 7            | 0.2 | 0.4 | 1.7  | 0.023719 |
| SAOUHSC_02380 - purine nucleoside phosphorylase [2.4.2.1] {Staphylo   | 32.8 ± 3    | 55.3 ± 12   | 50 ± 13    | 11.5 ± 5          | 0.6 | 0.7 | 2.8  | 0.004444 |
| SAOUHSC_02383 - conserved hypothetical protein {Staphylococcus aure   | 10.3 ± 1    | 17.3 ± 1    | 8.5 ± 1    | n.d. <sup>c</sup> | 0.6 | 1.2 | -    | 0.000018 |
| SAOUHSC_02399 - glucosamine--fructose-6-phosphate aminotransferase    | 19.3 ± 10   | 46.5 ± 27   | 18.5 ± 5   | 10.5 ± 2          | 0.4 | 1.0 | 1.8  | 0.222207 |
| SAOUHSC_02405 - phosphoglucosamine mutase [5.4.2.-] {Staphylococci    | 18 ± 1      | 36.5 ± 7    | 29.8 ± 3   | 8.5 ± 2           | 0.5 | 0.6 | 2.1  | 0.006197 |
| SAOUHSC_02447 - conserved hypothetical protein {Staphylococcus aure   | 14.3 ± 0    | 24.5 ± 6    | 23.3 ± 1   | 3.5 ± 2           | 0.6 | 0.6 | 4.1  | 0.002000 |
| SAOUHSC_02463 - hyaluronate lyase {Staphylococcus aureus NCTC 832     | 1071.8 ± 94 | 167.8 ± 31  | 213.8 ± 26 | 125.8 ± 23        | 6.4 | 5.0 | 8.5  | 0.000034 |
| SAOUHSC_02466 - truncated MHC class II analog protein {Staphylococci  | 47.5 ± 11   | 28 ± 8      | 27.5 ± 6   | 24.8 ± 5          | 1.7 | 1.7 | 1.9  | 0.055003 |
| SAOUHSC_02468 - acetolactate synthase, putative [4.1.3.18] {Staphylo  | 10.8 ± 4    | 24.8 ± 4    | 29 ± 3     | 3 ± 2             | 0.4 | 0.4 | 3.6  | 0.079480 |
| SAOUHSC_02477 - ribosomal protein S9, putative {Staphylococcus aure   | 17.8 ± 3    | 57.3 ± 30   | 16 ± 5     | 4 ± 1             | 0.3 | 1.1 | 4.4  | 0.003848 |
| SAOUHSC_02478 - ribosomal protein L13 {Staphylococcus aureus NCTC     | 17.8 ± 5    | 25.3 ± 10   | 17 ± 5     | n.d. <sup>c</sup> | 0.7 | 1.0 | -    | 0.007234 |
| SAOUHSC_02485 - DNA-directed RNA polymerase alpha chain, putative     | 26.3 ± 5    | 48.3 ± 2    | 51.8 ± 4   | 19.3 ± 6          | 0.5 | 0.5 | 1.4  | 0.198552 |
| SAOUHSC_02490 - adenylate kinase, putative [2.7.4.3] {Staphylococcus  | 21 ± 5      | 46.3 ± 9    | 37 ± 10    | 11.3 ± 5          | 0.5 | 0.6 | 1.9  | 0.109364 |
| SAOUHSC_02492 - ribosomal protein L15 {Staphylococcus aureus NCTC     | 21.3 ± 6    | 66.5 ± 9    | 35.5 ± 7   | 22.8 ± 9          | 0.3 | 0.6 | 0.9  | 0.445427 |
| SAOUHSC_02493 - ribosomal protein L30 {Staphylococcus aureus NCTC     | 12.5 ± 2    | 88.3 ± 25   | 39.3 ± 10  | 17.8 ± 2          | 0.1 | 0.3 | 0.7  | 0.070954 |
| SAOUHSC_02494 - ribosomal protein S5 {Staphylococcus aureus NCTC      | 23.3 ± 4    | 27 ± 9      | 14.8 ± 4   | 2.3 ± 1           | 0.9 | 1.6 | 10.3 | 0.001057 |
| SAOUHSC_02496 - ribosomal protein L6, putative {Staphylococcus aurei  | 25 ± 6      | 33.8 ± 16   | 19 ± 7     | 3 ± 1             | 0.7 | 1.3 | 8.3  | 0.007539 |
| SAOUHSC_02498 - ribosomal protein S8, putative {Staphylococcus aurei  | 14.3 ± 10   | 25.8 ± 8    | 14.3 ± 3   | n.d.              | 0.6 | 1.0 | -    | 0.099270 |
| SAOUHSC_02500 - 50S ribosomal protein L5, putative {Staphylococcus i  | 21 ± 4      | 36.3 ± 10   | 26.8 ± 2   | 3 ± 1             | 0.6 | 0.8 | 7.0  | 0.002952 |
| SAOUHSC_02501 - ribosomal protein L24 {Staphylococcus aureus NCTC     | 12.8 ± 4    | 15.3 ± 3    | 14.3 ± 1   | 5.5 ± 2           | 0.8 | 0.9 | 2.3  | 0.072080 |
| SAOUHSC_02507 - ribosomal protein L22 {Staphylococcus aureus NCTC     | 15.8 ± 6    | 18.8 ± 3    | 10.5 ± 3   | 1.3 ± 1           | 0.8 | 1.5 | 12.6 | 0.022276 |
| SAOUHSC_02512 - ribosomal protein L3, putative {Staphylococcus aurei  | 10.5 ± 2    | 41.5 ± 13   | 18.3 ± 4   | 5 ± 3             | 0.3 | 0.6 | 2.1  | 0.101045 |



|                                                                                                    |              |              |              |                   |     |     |      |          |
|----------------------------------------------------------------------------------------------------|--------------|--------------|--------------|-------------------|-----|-----|------|----------|
| SAOUHSC_02571 - secretory antigen precursor, putative {Staphylococcus aureus}                      | 632.5 ± 120  | 582.5 ± 208  | 894.5 ± 266  | 526.5 ± 160       | 1.1 | 0.7 | 1.2  | 0.307420 |
| SAOUHSC_02576 - secretory antigen precursor SsaA, putative {Staphylococcus aureus}                 | 572 ± 161    | 554.8 ± 138  | 549 ± 53     | 673.5 ± 257       | 1.0 | 1.0 | 0.8  | 0.374692 |
| SAOUHSC_02577 - D-isomer specific 2-hydroxyacid dehydrogenase, NAD-dependent                       | 18 ± 2       | 44.3 ± 6     | 37.5 ± 5     | 5.8 ± 4           | 0.4 | 0.5 | 3.1  | 0.017754 |
| SAOUHSC_02582 - formate dehydrogenase, alpha subunit, putative {Staphylococcus aureus}             | 22.8 ± 2     | 43.3 ± 6     | 27.3 ± 3     | 3.8 ± 2           | 0.5 | 0.8 | 6.1  | 0.000376 |
| SAOUHSC_02583 - transcriptional regulator, putative {Staphylococcus aureus}                        | 37.8 ± 3     | 40 ± 9       | 54 ± 10      | 52.8 ± 16         | 0.9 | 0.7 | 0.7  | 0.201137 |
| SAOUHSC_02650 - lipoprotein, putative {Staphylococcus aureus NCTC 8325}                            | 21 ± 7       | 30 ± 16      | 50.8 ± 19    | 38.8 ± 11         | 0.7 | 0.4 | 0.5  | 0.114048 |
| SAOUHSC_02690 - conserved hypothetical protein {Staphylococcus aureus}                             | 10.8 ± 5     | 9 ± 4        | 14.5 ± 5     | 11.8 ± 2          | 1.2 | 0.7 | 0.9  | 0.427689 |
| SAOUHSC_02699 - conserved hypothetical protein {Staphylococcus aureus}                             | 38.3 ± 10    | 52 ± 11      | 78.5 ± 26    | 56 ± 13           | 0.7 | 0.5 | 0.7  | 0.162223 |
| SAOUHSC_02703 - phosphoglycerate mutase, putative [5.4.2.1] {Staphylococcus aureus}                | 32.5 ± 6     | 165 ± 32     | 122.5 ± 31   | 16.8 ± 5          | 0.2 | 0.3 | 1.9  | 0.048066 |
| SAOUHSC_02706 - immunoglobulin G-binding protein Sbi, putative {Staphylococcus aureus}             | 143.3 ± 37   | 58 ± 5       | 63 ± 15      | 38.3 ± 10         | 2.5 | 2.3 | 3.7  | 0.017278 |
| SAOUHSC_02708 - gamma-hemolysin h-gamma-ii subunit, putative {Staphylococcus aureus}               | 40.8 ± 10    | 11.8 ± 3     | 11.8 ± 4     | n.d. <sup>c</sup> | 3.5 | 3.5 | -    | 0.003753 |
| SAOUHSC_02709 - leukocidin s subunit precursor, putative {Staphylococcus aureus}                   | 451 ± 116    | 166.3 ± 112  | 125.3 ± 83   | 25.5 ± 8          | 2.7 | 3.6 | 17.7 | 0.005341 |
| SAOUHSC_02710 - leukocidin f subunit precursor {Staphylococcus aureus}                             | 648.5 ± 52   | 131.5 ± 19   | 281.3 ± 53   | 24.5 ± 10         | 4.9 | 2.3 | 26.5 | 0.000011 |
| SAOUHSC_02742 - amino acid transporter, putative {Staphylococcus aureus}                           | 11.3 ± 2     | 2.8 ± 1      | 5 ± 2        | n.d. <sup>c</sup> | 4.1 | 2.3 | -    | 0.000288 |
| SAOUHSC_02767 - peptide ABC transporter, peptide-binding protein, putative                         | 11 ± 3       | 21.5 ± 3     | 27 ± 2       | 17.5 ± 5          | 0.5 | 0.4 | 0.6  | 0.166870 |
| SAOUHSC_02798 - Surface protein G (sasG)                                                           | 11.3 ± 2     | 3.8 ± 2      | 4.5 ± 1      | 2.5 ± 1           | 3.0 | 2.5 | 4.5  | 0.009728 |
| SAOUHSC_02860 - HMG-CoA synthase, putative {Staphylococcus aureus}                                 | 22.3 ± 4     | 66 ± 12      | 44.5 ± 9     | 12.8 ± 4          | 0.3 | 0.5 | 1.7  | 0.071061 |
| SAOUHSC_02862 - ATP-dependent Clp protease, ATP-binding subunit ClpX                               | 11.5 ± 1     | 36.8 ± 6     | 30 ± 6       | 3.5 ± 1           | 0.3 | 0.4 | 3.3  | 0.001810 |
| SAOUHSC_02869 - delta-1-pyrroline-5-carboxylate dehydrogenase, putative                            | 14.5 ± 5     | 30 ± 4       | 29.5 ± 4     | 8.8 ± 3           | 0.5 | 0.5 | 1.7  | 0.190439 |
| SAOUHSC_02883 - LysM domain protein [3.5.1.28] {Staphylococcus aureus}                             | 182.8 ± 33   | 135.8 ± 44   | 222 ± 93     | 166 ± 57          | 1.3 | 0.8 | 1.1  | 0.403257 |
| SAOUHSC_02885 - O-acetyltransferase OatA                                                           | 35.8 ± 8     | 10.3 ± 3     | 11.3 ± 4     | 10.3 ± 6          | 3.5 | 3.2 | 3.5  | 0.017941 |
| SAOUHSC_02887 - immunodominant antigen A, putative {Staphylococcus aureus}                         | 1520.8 ± 277 | 1243.8 ± 287 | 1852.8 ± 649 | 1115.8 ± 271      | 1.2 | 0.8 | 1.4  | 0.168007 |
| SAOUHSC_02922 - L-lactate dehydrogenase [1.1.1.27] {Staphylococcus aureus}                         | 64.5 ± 8     | 223.3 ± 84   | 99.3 ± 30    | 30 ± 7            | 0.3 | 0.6 | 2.2  | 0.008928 |
| SAOUHSC_02926 - fructose-bisphosphate aldolase class-I, putative [4.1.3.1] {Staphylococcus aureus} | 33 ± 5       | 106 ± 35     | 62.5 ± 17    | 31.8 ± 9          | 0.3 | 0.5 | 1.0  | 0.453858 |
| SAOUHSC_02927 - malate:quinone-oxidoreductase [1.1.99.16] {Staphylococcus aureus}                  | 35 ± 6       | 63.3 ± 23    | 44 ± 5       | 7 ± 3             | 0.6 | 0.8 | 5.0  | 0.002584 |
| SAOUHSC_02929 - acetyl-CoA synthetase, putative {Staphylococcus aureus}                            | 12.5 ± 2     | 16.3 ± 6     | 12.3 ± 4     | 2.5 ± 2           | 0.8 | 1.0 | 5.0  | 0.002840 |
| SAOUHSC_02963 - clumping factor B, putative {Staphylococcus aureus}                                | 17.5 ± 2     | 11 ± 1       | 21.5 ± 5     | 9.3 ± 3           | 1.6 | 0.8 | 1.9  | 0.030973 |
| SAOUHSC_02969 - arginine deiminase [3.5.3.6] {Staphylococcus aureus}                               | 16 ± 5       | 28.3 ± 3     | 24.5 ± 7     | 2.3 ± 1           | 0.6 | 0.7 | 7.1  | 0.014536 |
| SAOUHSC_02971 - aureolysin, putative {Staphylococcus aureus NCTC 8325}                             | 72.5 ± 3     | 16.3 ± 4     | 26.3 ± 7     | 18 ± 6            | 4.5 | 2.8 | 4.0  | 0.000114 |
| SAOUHSC_02972 - Immunodominant staphylococcal antigen B                                            | 21.8 ± 2     | 12 ± 1       | 22.3 ± 9     | 7.3 ± 3           | 1.8 | 1.0 | 3.0  | 0.004528 |
| SAOUHSC_02978 - phage infection protein, putative {Staphylococcus aureus}                          | 16.8 ± 3     | 9.8 ± 1      | 13.5 ± 3     | 11 ± 3            | 1.7 | 1.2 | 1.5  | 0.126738 |
| SAOUHSC_02979 - N-acetylmuramoyl-L-alanine amidase                                                 | 881.5 ± 76   | 688.5 ± 87   | 871.5 ± 192  | 514.3 ± 140       | 1.3 | 1.0 | 1.7  | 0.030274 |
| SAOUHSC_02982 - conserved hypothetical protein {Staphylococcus aureus}                             | 36 ± 3       | 28.5 ± 4     | 30.3 ± 4     | 19.8 ± 5          | 1.3 | 1.2 | 1.8  | 0.018681 |
| SAOUHSC_03006 - lipase [3.1.1.3] {Staphylococcus aureus NCTC 8325}                                 | 482.3 ± 127  | 99.8 ± 14    | 120 ± 36     | 65 ± 15           | 4.8 | 4.0 | 7.4  | 0.008478 |

<sup>a</sup>Spectral counts are the average and SEM of MudPIT data from four independent biological samples.

<sup>b</sup>p-values are calculated from the 0xMIC and 8xMIC spectral counts

<sup>c</sup>Not detected

Table S3. Fold-change in transcript levels in the presence of arylomycin C<sub>16</sub> relative to untreated control.<sup>a</sup>

| Locus | 1 µg/mL    | 2 µg/mL    | 8 µg/mL    |
|-------|------------|------------|------------|
| 00051 | 0.7 ± 0.2  | 0.8 ± 0    | 1.2 ± 0.1  |
| 00069 | 1.0 ± 0.02 | 1.0 ± 0.03 | 0.7 ± 0.1  |
| 00094 | 1.3 ± 0.2  | 1.0 ± 0.3  | 0.8 ± 0.1  |
| 00192 | 1.5 ± 0.1  | 1.4 ± 0.1  | 0.8 ± 0.2  |
| 00256 | 1.3 ± 0.1  | 1.5 ± 0.1  | 1.1 ± 0.1  |
| 00300 | 0.9 ± 0.3  | 1.2 ± 0.1  | 0.9 ± 0    |
| 00354 | 1.4 ± 0.6  | 0.9 ± 0.4  | 1.3 ± 0.3  |
| 00399 | 1.5 ± 0.3  | 1.1 ± 0.1  | 1.0 ± 0.1  |
| 00427 | 0.6 ± 0.6  | 1.3 ± 0.04 | 1.5 ± 0.1  |
| 00472 | 1.7 ± 0.2  | 1.3 ± 0.1  | 1.4 ± 0.1  |
| 00617 | 1.1 ± 0.2  | 1.7 ± 0.2  | 2.2 ± 0.2  |
| 00728 | 1.5 ± 0.2  | 1.4 ± 0.1  | 1.9 ± 0.5  |
| 00818 | 0.6 ± 0.03 | 0.9 ± 0.1  | 1.3 ± 0.2  |
| 00897 | 1.2 ± 0.1  | 1.4 ± 0.1  | 0.8 ± 0.01 |
| 00987 | 0.9 ± 0.1  | 1.3 ± 0.2  | 0.6 ± 0.7  |
| 00988 | 1.8 ± 0.3  | 1.3 ± 0.3  | 1.1 ± 0.3  |
| 00994 | 1.5 ± 0.1  | 1.5 ± 0.2  | 1.7 ± 0.2  |
| 01114 | 1.2 ± 0.03 | 1.3 ± 0.04 | 1.3 ± 0.03 |
| 01121 | 2.2 ± 0.4  | 2.4 ± 0.3  | 2.1 ± 0.3  |
| 01125 | 1.7 ± 0.04 | 1.6 ± 0.2  | 1.7 ± 0.2  |
| 01652 | 1.9 ± 0.2  | 2.0 ± 0.1  | 2.3 ± 0.1  |
| 01935 | 1.2 ± 0.2  | 0.6 ± 0.1  | 0.8 ± 0.2  |
| 01936 | 1.0 ± 0.2  | 0.5 ± 0.1  | 0.6 ± 0.1  |
| 01938 | 1.2 ± 0.3  | 0.5 ± 0.1  | 0.7 ± 0.1  |
| 01939 | 1.0 ± 0.02 | 1.0 ± 0.01 | 1.0 ± 0.01 |
| 01941 | 1.0 ± 0.1  | 1.0 ± 0.1  | 0.9 ± 0.01 |
| 01942 | 7.8 ± 0.7  | 4.6 ± 0.3  | 3.2 ± 0.3  |
| 01949 | 1.0 ± 0.03 | 0.9 ± 0.02 | 1.1 ± 0.1  |
| 01954 | 1.1 ± 0.1  | 0.7 ± 0.1  | 0.5 ± 0    |
| 02127 | 1.2 ± 0.2  | 0.9 ± 0.1  | 0.8 ± 0.1  |
| 02171 | 1.5 ± 0.7  | 1.5 ± 0.3  | 1.4 ± 0.4  |
| 02241 | 1.6 ± 0.7  | 1.1 ± 0.5  | 0.9 ± 0.4  |
| 02243 | 0.8 ± 0.1  | 0.5 ± 0    | 0.5 ± 0.1  |
| 02260 | 1.1 ± 0.4  | 0.8 ± 0.1  | 0.9 ± 0.2  |
| 02463 | 1.4 ± 0.03 | 1.5 ± 0.1  | 1.5 ± 0.1  |
| 02466 | 1.3 ± 0.2  | 2.3 ± 0.3  | 1.6 ± 0.05 |
| 02706 | 1.3 ± 0.3  | 0.8 ± 0.1  | 0.4 ± 0.03 |
| 02708 | 1.2 ± 0.02 | 1.1 ± 0.01 | 1.1 ± 0.04 |
| 02709 | 1.3 ± 0    | 0.8 ± 0.1  | 1.1 ± 0.2  |
| 02710 | 2.0 ± 0.3  | 1.0 ± 0.1  | 0.9 ± 0.1  |
| 02742 | 2.6 ± 0.2  | 3.2 ± 0.3  | 2.4 ± 0.2  |
| 02798 | 2.4 ± 0.03 | 1.5 ± 0.1  | 1.8 ± 0.3  |
| 02885 | 1.9 ± 0.2  | 1.0 ± 0.3  | 1.5 ± 0.3  |
| 02971 | 1.0 ± 0.01 | 1.0 ± 0.02 | 1.0 ± 0.02 |
| 02972 | 1.6 ± 0.02 | 1.9 ± 0.3  | 3.5 ± 0.5  |
| 02979 | 2.7 ± 0.2  | 2.6 ± 0.1  | 2.3 ± 0.3  |
| 03006 | 1.1 ± 0.03 | 2.0 ± 0.1  | 2.8 ± 0.2  |
| 01761 | 2.8 ± 0.4  | 3.7 ± 0.4  | 4.3 ± 0.5  |
| 01838 | 2.3 ± 0.4  | 2.2 ± 0.4  | 2.3 ± 0.2  |
| 01972 | 9.6 ± 2.8  | 16.3 ± 1.0 | 16.3 ± 0.4 |

<sup>a</sup>Values shown are changes with respect to untreated control samples. See Methods for details.
